# Supplementary material
Source: publisher figshare collection journal article supplement (https://rs.figshare.com/ndownloader/files/14829722)
Supplement: Supplementary file 1 [file 14829722]

## Sheet: Sheet1
Clade	Family	Genus	Species	Authority	FICC Voucher ID	Project ID	SRA Accession
Dendrobranchiata	Aristeidae	Aristaeopsis	edwardsiana	(Johnson, 1868)	820	18434	SRX5501416
Dendrobranchiata	Aristeidae	Hemipenaeus	carpenteri	Wood-Mason & Alcock, 1891	824	18435	SRX5501417
Dendrobranchiata	Benthesicymidae	Bentheogennema	intermedia	(Spence Bate, 1888)	1601	18436	SRX5501414
Dendrobranchiata	Benthesicymidae	Benthesicymus	bartletti	Smith, 1882	755	18437	SRX5501415
Dendrobranchiata	Luciferidae	Lucifer	sp.		778	18438	SRX5501412
Dendrobranchiata	Penaeidae	Farfantepenaeus	duorarum	(Burkenroad, 1939)	1114	18439	SRX5501413
Dendrobranchiata	Penaeidae	Funchalia	villosa	(Bouvier, 1905	1604	18440	SRX5501410
Dendrobranchiata	Sergestidae	Deosergestes	corniculum	(Krøyer, 1855)	1175	18441	SRX5501411
Dendrobranchiata	Sergestidae	Parasergestes	armatus	(Krøyer, 1855)	1173	18442	SRX5501418
Dendrobranchiata	Sergestidae	Sergestes	atlanticus	H. Milne Edwards, 1830	1171	18443	SRX5501419
Dendrobranchiata	Sicyoniidae	Sicyonia	stimpsoni	Bouvier, 1905	1605	18444	SRX5501376
Stenopodidea	Macromaxillocarididae	Macromaxillocaris	bahamaensis	Alvarez, Iliffe & Villalobos, 2006	785A	18365	SRX5501377
Stenopodidea	Spongicolidae	Microprosthema	manningi	Goy & Felder, 1988	1352A	18366	SRX5501378
Stenopodidea	Stenopodidae	Stenopus	scutellatus	Rankin, 1898	1363A	18367	SRX5501379
Stenopodidea	Stenopodidae	Stenopus	hispidus	(Olivier, 1811)	1291A	18445	SRX5501372
Procarididea	Procarididae	Procaris	ascensionis	Chace & Manning, 1972	2276	18369	SRX5501373
Caridea	Alpheidae	Alpheus	nr. armatus		13541Anew	18356	SRX5501374
Caridea	Atyidae	Atyopsis	sp.		544A	18357	SRX5501375
Caridea	Barbouriidae	Barbouria	cubensis	(von Martens, 1872)	1392A	18358	SRX5501370
Caridea	Hippolytidae	Hippolyte	zostericola	(Smith, 1873)	1358Anew	18360	SRX5501371
Caridea	Lysmatidae	Lysmata	sp.		1353Anew	18361	SRX5501435
Caridea	Oplophoridae	Oplophorus	gracilirostris	A. Milne-Edwards, 1881	754new	18362	SRX5501434
Caridea	Palaemonidae	Gnathophyllum	americanum	Guérin-Méneville, 1855	1331Anew	18359	SRX5501437
Caridea	Palaemonidae	Periclimenes	rathbunae	Schmitt, 1924	1350	18433	SRX5501436
Caridea	Thoridae	Thor	nr. amboinensis		1332A	18363	SRX5501431
Achelata	Palinuridae	Jasus	edwardsii	(Hutton, 1875)	73	18393	SRX5501430
Achelata	Palinuridae	Linuparus	trigonus	(von Siebold, 1824)	72	18394	SRX5501433
Achelata	Palinuridae	Palinurus	elephas	(Fabricius, 1787)	59	18395	SRX5501432
Achelata	Palinuridae	Palinustus	waguensis	Kubo, 1963	81	18396	SRX5501439
Achelata	Palinuridae	Panulirus	argus	(Latreille, 1804)	1309A1	18427	SRX5501438
Achelata	Palinuridae	Sagmariasus	verreauxi	(H. Milne Edwards, 1851)	71	18397	SRX5501456
Achelata	Scyllaridae	Arctides	regalis	Holthuis, 1963	681	18398	SRX5501457
Achelata	Scyllaridae	Ibacus	peronii	Leach, 1815	21	18399	SRX5501454
Achelata	Scyllaridae	Ibacus	novemdentatus	Gibbes, 1850	1682	18409	SRX5501455
Achelata	Scyllaridae	Parribacus	antarcticus	(Lund, 1793)	82	18400	SRX5501452
Achelata	Scyllaridae	Scyllarides	squammosus	(H. Milne Edwards, 1837)	691	18401	SRX5501453
Polychelida	Polychelidae	Polycheles	typhlops	Heller, 1862	88	18411	SRX5501450
Polychelida	Polychelidae	Stereomastis	sculpta	(Smith, 1880)	1705	18412	SRX5501451
Astacidea	Astacidae	Pacifastacus	leniusculus	(Dana, 1852)	1755	18402	SRX5501458
Astacidea	Cambaridae	Fallicambarus	macneesei	(Black, 1967)	1757	18404	SRX5501459
Astacidea	Cambaridae	Hobbseus	attenuatus	Black, 1969	1758	18405	SRX5501407
Astacidea	Cambaridae	Faxonius	validus	(Faxon, 1914)	1760	18410	SRX5501406
Astacidea	Cambaridae	Procambarus	clarkii	(Girard, 1852)	1374	18430	SRX5501405
Astacidea	Cambaroididae	Cambaroides	japonicus	(De Haan, 1841)	693	18403	SRX5501404
Astacidea	Nephropidae	Nephropides	caribaeus	Manning, 1969	461	18406	SRX5501403
Astacidea	Nephropidae	Nephropsis	sp.		2278	18353	SRX5501402
Astacidea	Nephropidae	Thaumastocheles	dochmiodon	Chan & Saint Laurent, 1999	457	18407	SRX5501401
Astacidea	Parastacidae	Cherax	quadricarinatus	(von Martens, 1868)	1974	18408	SRX5501400
Axiidea	Axiidae	Axiopsis	serratifrons	(A. Milne-Edwards, 1873)	1346	18420	SRX5501409
Axiidea	Callianassidae	Callichirus	major	(Say, 1818)	977	18421	SRX5501408
Axiidea	Callianassidae	Neocallichirus	grandimana	(Gibbes, 1850)	1027	18422	SRX5501420
Axiidea	Callianassidae	Sergio	trilobata	(Biffar, 1970)	2388	18368	SRX5501421
Axiidea	Callianideidae	Paracallianidea	laevicauda	(Gill, 1859)	1709	18423	SRX5501422
Axiidea	Gourretiidae	Gourretia	sp.		610	18424	SRX5501423
Gebiidea	Axianassidae	Axianassa	intermedia	Schmitt, 1924	372	18425	SRX5501424
Gebiidea	Laomediidae	Naushonia	sp.		1710	18426	SRX5501425
Anomura	Coenobitidae	Birgus	latro	(Linnaeus, 1767)	346	18414	SRX5501426
Anomura	Coenobitidae	Coenobita	clypeatus	(Fabricius, 1787)	1379	18428	SRX5501427
Anomura	Diogenidae	Petrochirus	diogenes	(Linnaeus, 1758)	1025	18415	SRX5501428
Anomura	Eumunididae	Eumunida	picta	Smith, 1883	191	18413	SRX5501429
Anomura	Hippidae	Emerita	talpoida	(Say, 1817)	1294	18429	SRX5501383
Anomura	Lithodidae	Paralithodes	camtschaticus	(Tilesius, 1815)	1707	18416	SRX5501382
Anomura	Munididae	Munida	simplex	Benedict, 1902	2481	18446	SRX5501385
Anomura	Paguridae	Pagurus	maclaughlinae	García-Gómez, 1982	962	18417	SRX5501384
Anomura	Parapaguridae	Sympagurus	pictus	Smith, 1883	169	18418	SRX5501387
Anomura	Porcellanidae	Allopetrolisthes	angulosus	(Guérin, 1835)	110	18419	SRX5501386
Brachyura	Belliidae	Acanthocyclus	hassleri	Rathbun, 1898	121	18371	SRX5501389
Brachyura	Corystidae	Jonas	distinctus	(De Haan, 1835)	1688	18385	SRX5501388
Brachyura	Dromiidae	Moreiradromia	antillensis	(Stimpson, 1858)	247	18373	SRX5501381
Brachyura	Epialtidae	Libinia	dubia	H. Milne Edwards, 1834	1024	18381	SRX5501380
Brachyura	Epialtidae	Taliepus	dentatus	(H. Milne Edwards, 1834)	104	18374	SRX5501394
Brachyura	Geryonidae	Chaceon	maritae	(Manning & Holthuis, 1981)	13	18375	SRX5501395
Brachyura	Grapsidae	Pachygrapsus	transversus	(Gibbes, 1850)	1300	18376	SRX5501392
Brachyura	Inachoididae	Stenorhynchus	seticornis	(Herbst, 1788)	2495	18378	SRX5501393
Brachyura	Leucosiidae	Callidactylus	asper	Stimpson, 1871	2496	18384	SRX5501398
Brachyura	Menippidae	Menippe	nodifrons	Stimpson, 1859	1075	18431	SRX5501399
Brachyura	Mithracidae	Pitho	aculeata	(Gibbes, 1850)	245	18387	SRX5501396
Brachyura	Ocypodidae	Ocypode	quadrata	(Fabricius, 1787)	264B	18432	SRX5501397
Brachyura	Panopeidae	Panopeus	lacustris	Desbonne, 1867	2281	18380	SRX5501390
Brachyura	Plagusiidae	Plagusia	depressa	(Fabricius, 1775)	1683	18377	SRX5501391
Brachyura	Platyxanthidae	Homalaspis	plana	(H. Milne Edwards, 1834)	154	18382	SRX5501445
Brachyura	Portunidae	Callinectes	ornatus	Ordway, 1863	1026	18383	SRX5501444
Brachyura	Sesarmidae	Aratus	pisonii	(H. Milne Edwards, 1837)	980	18386	SRX5501443
Brachyura	Trichopeltariidae	Peltarion	spinulosum	(White, 1843)	184	18372	SRX5501442
Brachyura	Varunidae	Cyclograpsus	integer	H. Milne Edwards, 1837	987	18388	SRX5501449
Brachyura	Varunidae	Eriocheir	sinensis	H. Milne Edwards, 1853	N/A	N/A	N/A
Brachyura	Xanthidae	Actaea	acantha	(H. Milne Edwards, 1834)	220	18389	SRX5501448
Brachyura	Xanthidae	Cataleptodius	floridanus	(Gibbes, 1850)	976	18390	SRX5501447
OUTGROUPS
Anostraca	Branchinetidae	Branchinecta	sp.		1206	18352	SRX5501446
Peracarida	Gammaracanthidae	Gammaracanthus	loricatus	(Sabine, 1824)	1211	18354	SRX5501441
Peracarida	Caprellidae	Caprella	carina	Mayer, 1903	1209	18355	SRX5501440
Peracarida	Mysidae	Mysidium	cf. integrum	W. Tattersall, 1951	1339A	18364	SRX5501460
Peracarida	Cirolanidae	Bathynomus	giganteus	A. Milne-Edwards, 1879	2546	18447	SRX5501461
Stomatopoda	Nannosquillidae	Coronis	scolopendra	Latreille, 1828	979	18391	SRX5501462
Stomatopoda	Gonodactylidae	Neogonodactylus	oerstedii	(Hansen, 1895)	1345	18392	SRX5501463
